# Supplementary material for: Risk of Exacerbation and Pneumonia with Single-Inhaler Triple versus Dual Therapy in IMPACT
Source: PubMed Central journal article supplement — Ann Am Thorac Soc. 2021 May;18(5):788–98. doi: 10.1513/AnnalsATS.202002-096OC (PMC8086537; doi:10.1513/annalsats.202002-096oc), 2021-05
Supplement: AnnalsATS.202002-096OC_dransfield_data_supplement.pdf [file AnnalsATS.202002-096OC_dransfield_data_supplement.pdf]

## Online Supplement

### **Risk of Exacerbation and Pneumonia with Single Inhaler Triple Versus Dual Therapy in IMPACT**

Mark T. Dransfield MD, Courtney Crim MD, Gerard Criner MD, Nicola C. Day PhD, David M.G. Halpin MD, MeiLan K. Han MD MS, C. Elaine Jones PhD, Sally Kilbride MSc, David LaFon MD, David A. Lipson MD, David A. Lomas MD PhD, Neil Martin MD, Fernando J. Martinez MD, Dave Singh MD, Robert A. Wise MD, and Peter Lange MD

Table E1. Rates and rate ratios for the composite endpoints of exacerbation and pneumonia by ICS use at screening\*.

|                                                                                                                                              | Model estimated annual rates (95% CI) |                   |                   | Rate ratio (95% CI) |                       |
|----------------------------------------------------------------------------------------------------------------------------------------------|---------------------------------------|-------------------|-------------------|---------------------|-----------------------|
|                                                                                                                                              | FF/UMEC/VI                            | FF/VI             | UMEC/VI           | FF/UMEC/VI vs FF/VI | FF/UMEC/VI vs UMEC/VI |
| <b>On-treatment moderate/severe exacerbations and investigator-reported pneumonia</b>                                                        |                                       |                   |                   |                     |                       |
| <b>ICS use: Yes</b>                                                                                                                          | 1.01 (0.96, 1.06)                     | 1.18 (1.13, 1.24) | 1.36 (1.28, 1.46) | 0.85 (0.80, 0.91)   | 0.74 (0.68, 0.80)     |
| <b>ICS use: No</b>                                                                                                                           | 0.80 (0.73, 0.89)                     | 0.92 (0.84, 1.01) | 0.85 (0.74, 0.98) | 0.87 (0.76, 1.00)   | 0.94 (0.80, 1.12)     |
| <b>On-treatment severe exacerbations and investigator-reported pneumonia resulting in hospitalization/prolonged hospitalization or death</b> |                                       |                   |                   |                     |                       |
| <b>ICS use: Yes</b>                                                                                                                          | 0.17 (0.15, 0.19)                     | 0.19 (0.17, 0.21) | 0.24 (0.20, 0.27) | 0.90 (0.78, 1.04)   | 0.73 (0.61, 0.87)     |
| <b>ICS use: No</b>                                                                                                                           | 0.14 (0.11, 0.17)                     | 0.13 (0.10, 0.16) | 0.16 (0.12, 0.21) | 1.05 (0.78, 1.42)   | 0.87 (0.60, 1.24)     |

Post hoc analyses. Number of patients in the analyses: ICS use: Yes: FF/UMEC/VI n=3198, FF/VI n=3157, UMEC/VI n=1600; ICS use: No: FF/UMEC/VI n=947, FF/VI n=976, UMEC/VI n=469. \*In the 3 days prior to and including the screening date. CI, confidence interval; FF, fluticasone furoate; ICS, inhaled corticosteroid; UMEC, umecclidinium; VI, vilanterol.

**Figure E1. Cumulative plots of moderate/severe exacerbation and investigator-reported pneumonia by ICS use at screening\*.**

**A. ICS use: Yes**

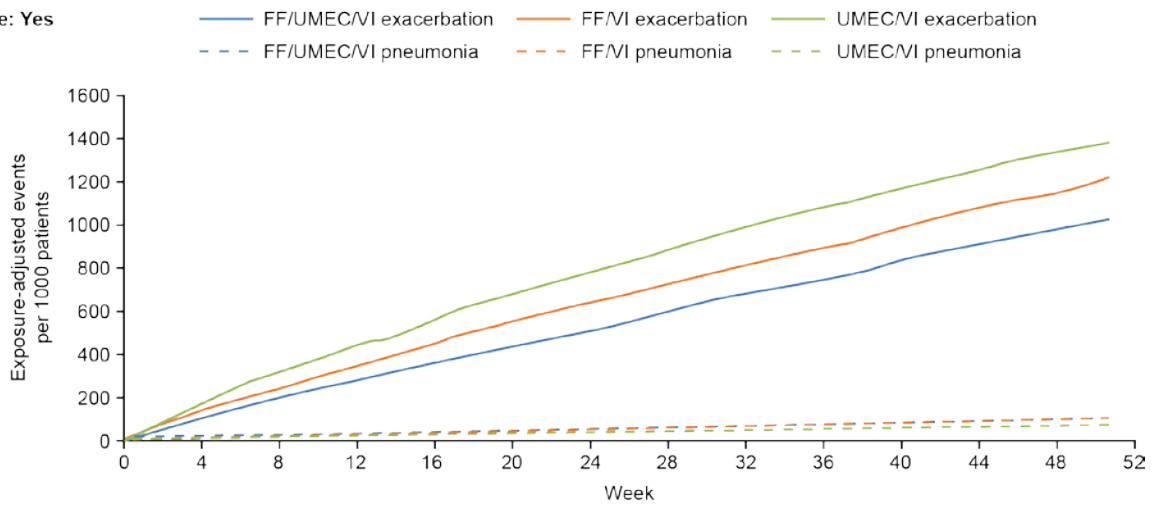

Proportion of patients on-treatment

|            |      |      |      |      |      |      |      |      |      |      |      |      |      |
|------------|------|------|------|------|------|------|------|------|------|------|------|------|------|
| FF/UMEC/VI | 1.00 | 0.98 | 0.95 | 0.93 | 0.91 | 0.90 | 0.89 | 0.88 | 0.86 | 0.85 | 0.84 | 0.83 | 0.83 |
| FF/VI      | 1.00 | 0.95 | 0.91 | 0.88 | 0.86 | 0.84 | 0.82 | 0.81 | 0.79 | 0.78 | 0.77 | 0.76 | 0.75 |
| UMEC/VI    | 1.00 | 0.95 | 0.89 | 0.86 | 0.84 | 0.81 | 0.79 | 0.77 | 0.75 | 0.74 | 0.74 | 0.72 | 0.72 |

**B. ICS use: No**

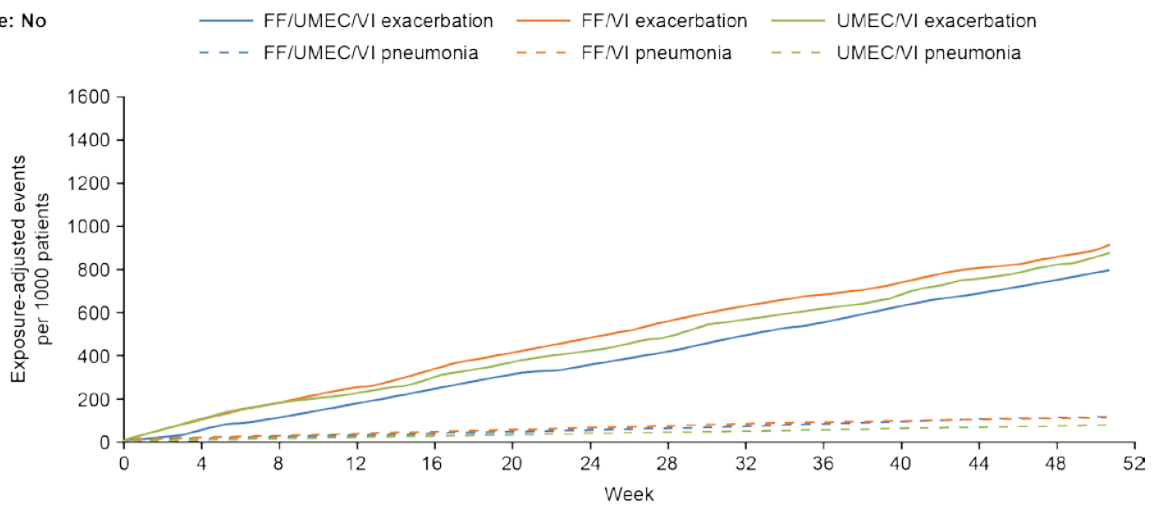

Proportion of patients on-treatment

|            |      |      |      |      |      |      |      |      |      |      |      |      |      |
|------------|------|------|------|------|------|------|------|------|------|------|------|------|------|
| FF/UMEC/VI | 1.00 | 0.98 | 0.96 | 0.95 | 0.94 | 0.93 | 0.92 | 0.91 | 0.90 | 0.89 | 0.88 | 0.86 | 0.85 |
| FF/VI      | 1.00 | 0.97 | 0.93 | 0.91 | 0.89 | 0.86 | 0.85 | 0.84 | 0.82 | 0.81 | 0.81 | 0.80 | 0.79 |
| UMEC/VI    | 1.00 | 0.97 | 0.93 | 0.92 | 0.91 | 0.89 | 0.88 | 0.87 | 0.86 | 0.86 | 0.84 | 0.82 | 0.82 |

\*In the 3 days prior to and including the screening date. FF, fluticasone furoate; ICS, inhaled corticosteroid; UMEC, umeclidinium; VI, vilanterol.

**Figure E2. Cumulative plots of severe exacerbation and investigator-reported pneumonia resulting in hospitalization/prolonged hospitalization or death by ICS use at screening\*.**

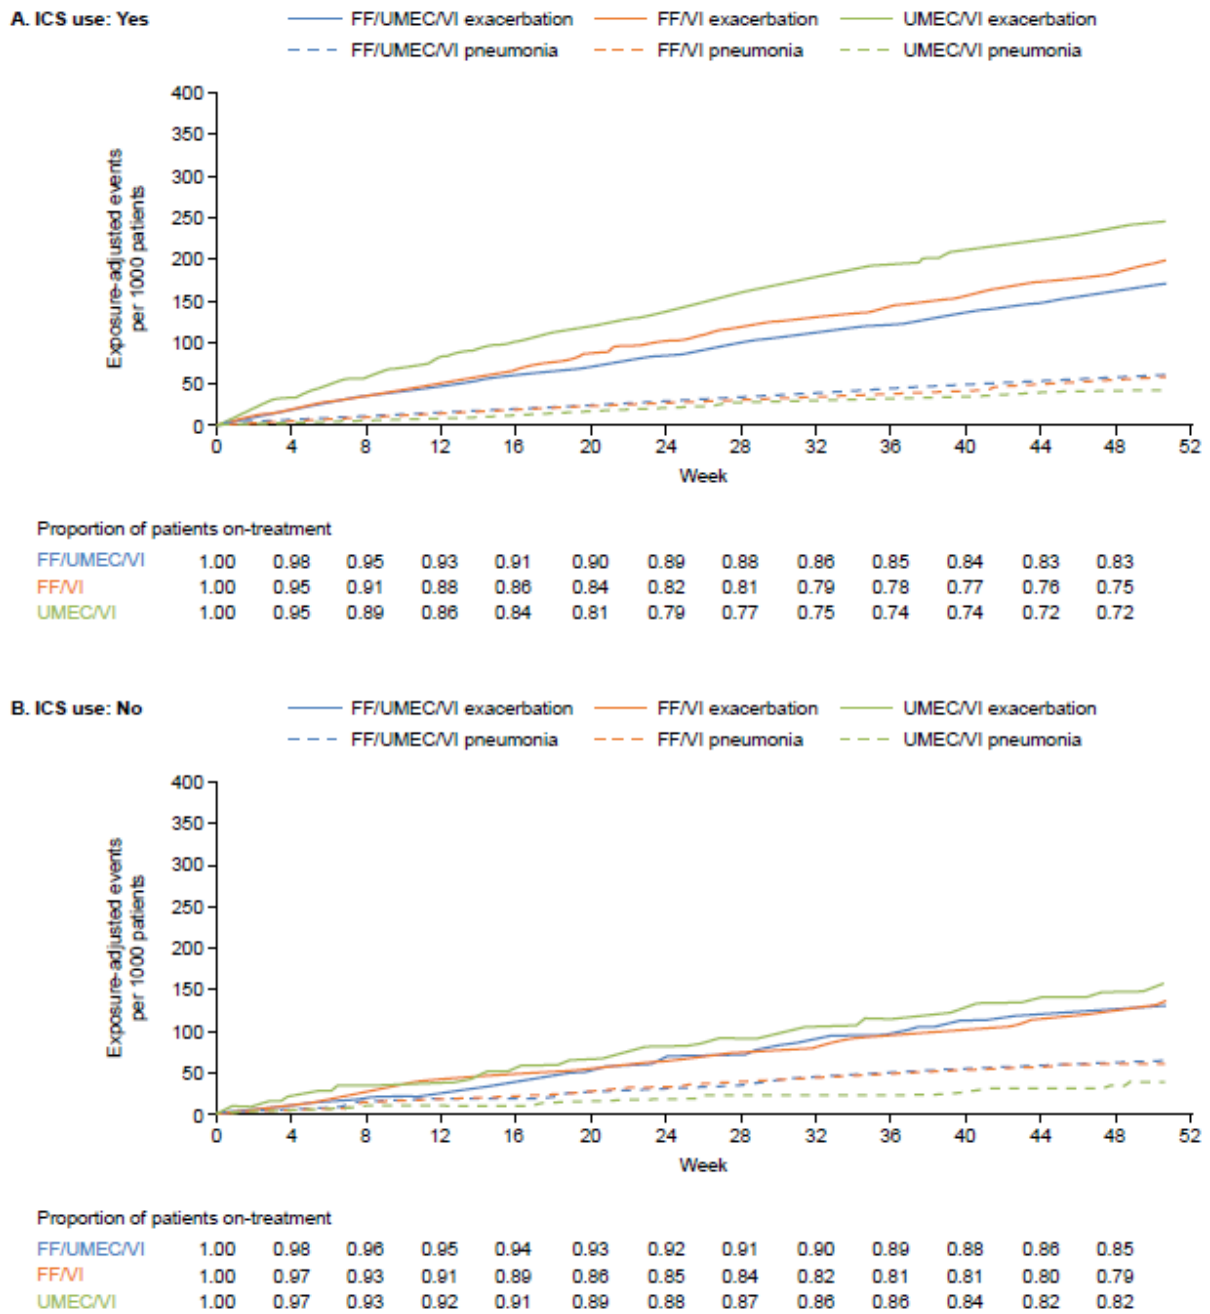

\*In the 3 days prior to and including the screening date. FF, fluticasone furoate; ICS, inhaled corticosteroid; UMEC, umeclidinium; VI, vilanterol.
